# Supplementary material
Source: PubMed Central journal article supplement (PMC7724331)
Supplement: ajtr0012-7340-f6.pdf [file ajtr0012-7340-f6.pdf]

## FBN1/TIMP1 promotes cell migration in DLBCL

**Supplementary Table 1.** The sequences of FBN1 and TIMP1 siRNAs

---

|             |                             |
|-------------|-----------------------------|
| FBN1 siRNA  | 5'-UUGCAAUACAUUUAAAACUG-3'  |
|             | 5'-GUUUUAAAUGUAUUUGCAAAC-3' |
| TIMP1 siRNA | 5'-AUACAUCUUGGUCUUCUUGAU-3' |
|             | 5'-CAAGAUGACCAAGAUGUAUAA-3' |

---
